# Supplementary material for: Orphan GPR26 Counteracts Early Phases of Hyperglycemia-Mediated Monocyte Activation and Is Suppressed in Diabetic Patients
Source: MDPI journal article supplement (doi:10.3390/biomedicines10071736), 2022-07-19
Supplement: s1 [file s1]

## Supplementary material and methods

**Supplementary Table S1.** Sequence of primers against the human genes analyzed by qPCR.

| <i>Gene</i>  | Forward primer               | Reverse primer               |
|--------------|------------------------------|------------------------------|
| <i>GPR26</i> | 5'- GGGTGGGACATCTGTGTGTT -3' | 5'- ACGGGCACAGACTTATGC -3'   |
| <i>B2M</i>   | 5'- GATGAGTATGCCTGCCGTGT -3' | 5'- TCGGGCATCTTCAAACCTCC -3' |

**Supplementary Table S2.** List of antibodies for western blot (WB)

| Antigen                                            | supplier | Clone / Cat. no. | Concentration |
|----------------------------------------------------|----------|------------------|---------------|
| <b>Primary antibodies for WB</b>                   |          |                  |               |
| Caspase-3                                          | CST      | 8G10 / 9665      | 1:1000        |
| Cleaved caspase-3                                  | CST      | 5A1E / 9664      | 1:1000        |
| LC3B                                               | CST      | D11 / 3868       | 1:1000        |
| p38 MAPK                                           | CST      | 9212             | 1:1000        |
| Phospho-p38<br>MAPK(p-p38)                         | CST      | 9211             | 1:1000        |
| p44/42 MAPK<br>(Erk1/2)                            | CST      | 9102             | 1:1000        |
| phospho-p44/42<br>MAPK (Erk1/2)<br>(Thr202/Tyr204) | CST      | 9101             | 1:1000        |
| SQSTM1/p62                                         | CST      | 5114             | 1:1000        |
| NF-κB (p65)                                        | CST      |                  | 1:1000        |
| β-actin                                            | SCB      | 2418             | 1:4000        |
| <b>Secondary antibody for WB</b>                   |          |                  |               |
| Goat anti -rabbit IgG<br>(HRP)                     | CST      | 7074             | 1:2000        |

CST: Cell Signaling Technology; SCB: Santa Cruz Biotechnology
